# Supplementary material for: Synthesis and mesophase behaviour of ionic liquid crystals
Source: Royal Society of Chemistry journal article supplement (doi:10.1039/b705519f), 2007-01-01
Supplement: b705519f.pdf [file b705519f.pdf]

## Electronic Supporting Information

### Synthesis and mesophase behaviour of ionic liquid crystals

D. Ster<sup>1</sup>, U. Baumeister<sup>2</sup>, J. Lorenzo Chao<sup>2</sup>, C. Tschierske<sup>1</sup>, G. Israel<sup>1</sup>

<sup>1</sup>*Institute of Chemistry (OC), Martin-Luther-University Halle-Wittenberg, Kurt-Mothes-Str. 2, D-06120 Halle (Saale), Germany,* <sup>2</sup>*Institute of Chemistry (PC), Martin-Luther-University Halle-Wittenberg, Mühlpforte 1, D-06108 Halle (Saale), Germany*

#### 1. Experimental conditions for X-ray scattering and supporting X-ray data

Powder X-ray investigations were carried out with a Guinier film camera and a Guinier Goniometer (Huber Diffraktionstechnik, Germany). Samples in glass capillaries ( $\varnothing$  1 mm) in a temperature-controlled heating stage, quartz-monochromatized  $\text{CuK}_{\alpha}$  radiation, 30 to 60 min exposure time, calibration with the powder pattern of  $\text{Pb}(\text{NO}_3)_2$ . 2D patterns for aligned samples on a glass plate on a temperature-controlled heating stage (alignment at the sample – glass or at the sample – air interface) were recorded with a 2D detector (HI-STAR, Siemens) using  $\text{CuK}_{\alpha}$  radiation monochromatized by a Ni filter.

**2. Additional Tables****Table S1.** X-ray data for the SmA phases from Guinier powder patterns ( $\theta_{\text{obs}}$ : experimental scattering angle;  $d_{\text{obs}}$ : experimental d spacing;  $n$ : order of reflection)

| Comp.     | $T$<br>(°C) | $\theta_{\text{obs}}$<br>(°) | $d_{\text{obs}}$<br>(nm) | $n$  |
|-----------|-------------|------------------------------|--------------------------|------|
| <b>2e</b> | 136         | 1.247                        | 3.54                     | 1    |
|           | 129         | 1.243                        | 3.55                     | 1    |
|           | 122         | 1.239                        | 3.56                     | 1    |
|           | 115         | 230                          | 3.59                     | 1    |
| <b>2g</b> | 150         | 1.191                        | 3.71                     | 1    |
|           | 140         | 1.182                        | 3.73                     | 1    |
|           | 130         | 1.174                        | 3.76                     | 1    |
|           | 120         | 1.162                        | 3.80                     | 1    |
|           | 110         | 1.135                        | 3.46                     | 1    |
|           | 100         | 2.549                        | 1.73                     | 1    |
|           | <b>2h</b>   | 150                          | 1.145                    | 3.86 |
| 140       |             | 1.135                        | 3.89                     | 1    |
| 130       |             | 1.119                        | 3.95                     | 1    |
| 120       |             | 1.105                        | 4.00                     | 1    |
| 110       |             | 1.090                        | 4.05                     | 1    |
| 100       |             | 1.075                        | 4.11                     | 1    |
| <b>2i</b> | 150         | 1.184                        | 3.73                     | 1    |
|           |             | 2.351                        | 1.88                     | 2    |

| Comp.     | $T$<br>(°C) | $\theta_{\text{obs}}$<br>(°) | $d_{\text{obs}}$<br>(nm) | $n$ |
|-----------|-------------|------------------------------|--------------------------|-----|
| <b>3e</b> | 125         | 1.125                        | 3.93                     | 1   |
|           |             | 2.268                        | 1.95                     | 2   |
|           | 110         | 1.112                        | 3.97                     | 1   |
|           |             | 2.241                        | 1.97                     | 2   |
|           | 95          | 1.100                        | 4.02                     | 1   |
|           |             | 2.206                        | 2.00                     | 2   |
|           | 80          | 1.088                        | 4.06                     | 1   |
|           |             | 2.169                        | 2.04                     | 2   |
|           | 65          | 1.062                        | 4.16                     | 1   |
|           |             | 2.122                        | 2.08                     | 2   |
| <b>3f</b> | 50          | 1.038                        | 4.26                     | 1   |
|           |             | 2.088                        | 2.12                     | 2   |
|           | 140         | 1.175                        | 3.76                     | 1   |
|           | 130         | 1.162                        | 3.80                     | 1   |
| <b>4e</b> | 120         | 1.138                        | 3.88                     | 1   |
|           | 110         | 1.138                        | 3.88                     | 1   |
|           | 150         | 1.144                        | 3.86                     | 1   |
|           | 160         | 1.159                        | 3.81                     | 1   |
|           | 170         | 1.167                        | 3.78                     | 1   |

**3. Additional Figures**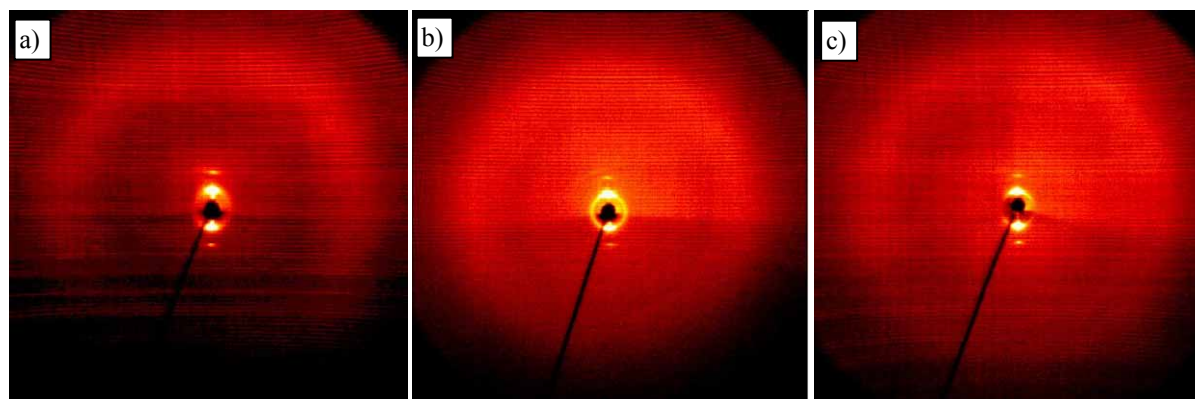

**Fig. S1** Original 2D X-ray diffraction patterns of the SmA phase a) of **2e** at 149 °C, b) of **2i** at 150 °C and c) of **3e** at 129 °C.

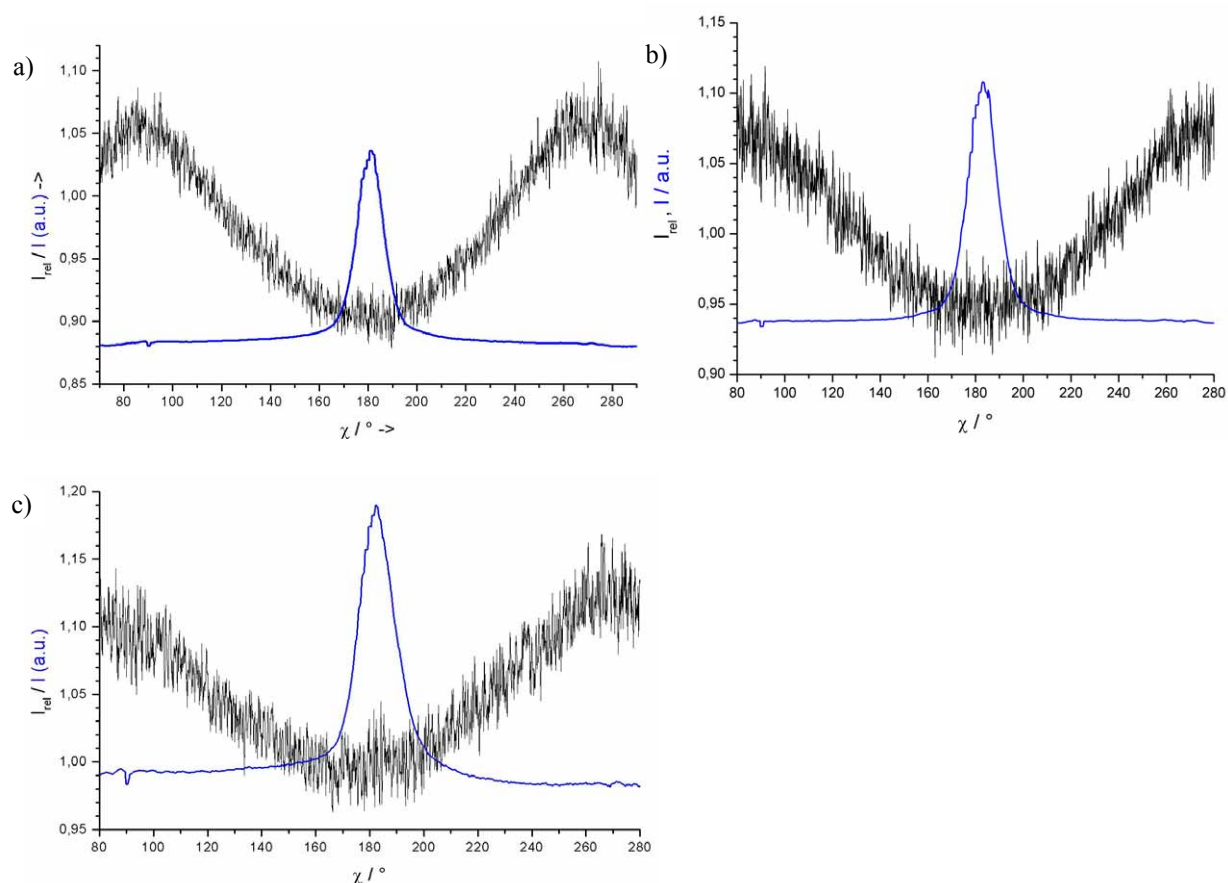

**Fig. S2**  $\chi$ -scans for the 2D X-ray patterns in the SmA phase of a) **2e** at 149 °C, b) **2i** at 150 °C and c) **3e** at 129 °C [black lines ... outer diffuse scattering, maxima on the equator of the patterns at  $\chi \approx 90$  and  $270^\circ$ ,  $I_{\text{rel}} = I(T) / I$  (isotropic liquid), blue lines ... layer reflections, maxima on the meridian of the patterns at  $\chi \approx 180$ ,  $I / \text{a.u.}$ ]

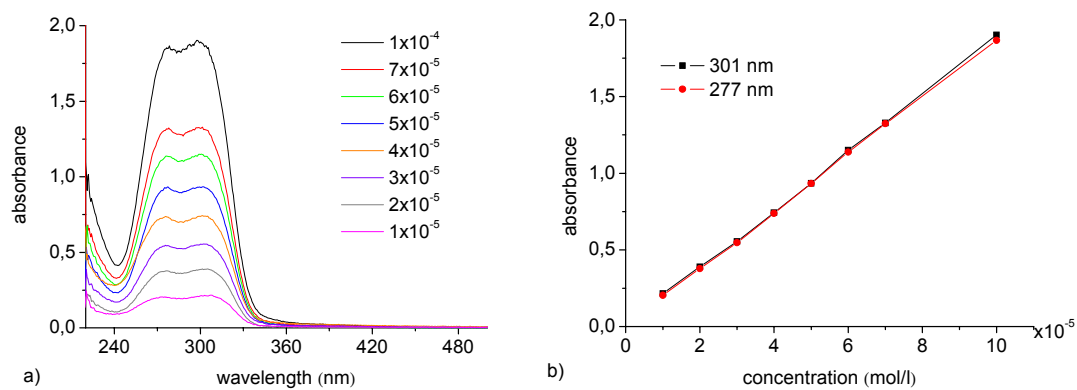

**Fig. S3** a) Concentration dependence of **2g** in 1, 2-dichloroethane,  $l = 1$  cm,  $l$  – path length of the quartz cell b) Lambert – Beer plot.
